# Supplementary material for: The ability to utilise ammonia as nitrogen source is cell type specific and intricately linked to GDH, AMPK and mTORC1
Source: PubMed Central journal article supplement (PMC6365639; doi:10.1038/s41598-018-37509-3), 2019-02-06

**The ability to utilise ammonia as nitrogen source is cell type specific and intricately linked to GDH, AMPK and mTORC1. (max 20 words)**

Shervi Lie<sup>1</sup>, Tingting Wang<sup>1</sup>, Briony Forbes<sup>1</sup>, Christopher G. Proud<sup>2</sup> & \*Janni Petersen<sup>1,2</sup>.

<sup>1</sup> Flinders Centre for Innovation in Cancer, College of Medicine and Public health, Flinders University, Adelaide, SA 5042, Australia.

<sup>2</sup> Nutrition and Metabolism, South Australia Health and Medical Research Institute, North Terrace, PO Box 11060, Adelaide, SA 5000, Australia.

\*Corresponding author email: [janni.petersen@flinders.edu.au](mailto:janni.petersen@flinders.edu.au)

## Supplementary figures

### Supplementary Figure 1. Effects of AMPK activation using metformin on mTORC1 activity and proliferation in HEK293 cells

HEK293 cells were plated in full media containing glutamine for 24 h. Cultures were washed with DPBS and fresh glutamine-depleted media with or without  $\text{NH}_4\text{Cl}$  or metformin (5 mM) was added. Cells cultured in glutamine-depleted media with or without  $\text{NH}_4\text{Cl}$  or water served as vehicle controls. Cultures were collected at 4 h and 3 days post-incubation for protein extraction or subjected to live imaging using Incucyte FLR assay ( $n = 3$ ) to measure cell proliferation rate over 7 days (C). Protein abundance of phosphorylated ACC (S79) (A) or S6K (T389) (B) relative to total ACC or S6K was quantified using western blot.

Relative signal density shown in the graphs were averaged density  $\pm$  standard deviation from 2 independent experiments. Blots shown were representative from 2 independent experiments.

\*  $p \leq 0.05$ , \*\*  $p \leq 0.01$ , \*\*\*  $p \leq 0.001$ .

Full length blots are presented in Supplementary information, Supplementary Figure 1.

### Supplementary Figure 2. Effects of DMSO and AMPK activation on T47D cell proliferation

T47D cells were plated in full media containing glutamine for 24 h. Cultures were washed with DPBS and fresh glutamine-depleted media with or without  $\text{NH}_4\text{Cl}$  or DMSO or A769662 (100  $\mu\text{M}$ ) or metformin (5 mM) was added. Cultures were subjected to live imaging using Incucyte FLR assay ( $n = 3$ ) to measure cell proliferation rate over 7 days (A, B & E) or collected at 4 h and 3 days post-incubation for protein extraction. Protein abundance of phosphorylated ACC (S79) (C) or S6K (T389) (D) relative to total ACC or S6K was quantified using western blot.

Relative signal density shown in the graphs were averaged density  $\pm$  standard deviation from 2 independent experiments. Blots shown were representative from 2 independent experiments.

\*  $p \leq 0.05$ , \*\*  $p \leq 0.01$ , \*\*\*  $p \leq 0.001$ .

Full length blots are presented in Supplementary information, Supplementary Figure 1.

**Supplementary Figure 3.** Effect of high dose of GDH inhibition on proliferation in HEK293 cells

HEK293 cells were plated in full media containing glutamine for 24 h. Cultures were washed with DPBS and fresh glutamine-depleted media with or without NH<sub>4</sub>Cl or hexachlorophene (Hex – 5 μM) was added. Cells cultured in glutamine-depleted media with or without NH<sub>4</sub>Cl or DMSO served as vehicle controls. Cultures were subjected to live imaging using Incucyte FLR assay (n = 3) to measure cell proliferation rate over 7 days.

\* p ≤ 0.05, \*\* p ≤ 0.01, \*\*\* p ≤ 0.001.

**Supplementary Figure 4.** Full length blots of all Western blots.

(A) Full length blots for figure 2. (B) Full length blots for figure 5. (C) Full length blots for figure 6. (D) Full length blots for figure 7. (E) Full length blots for figure 8. (F) Full length blots for figure 9. (G) Full length blots for figure S1 (H) Full length blots for figure S2

# Supplementary Figure 1.

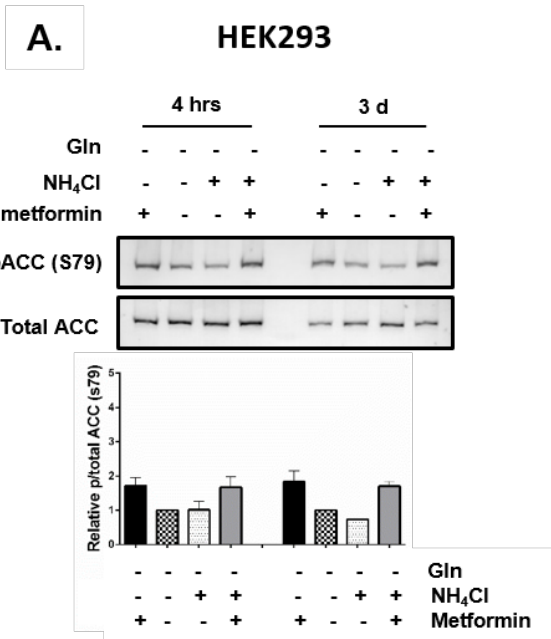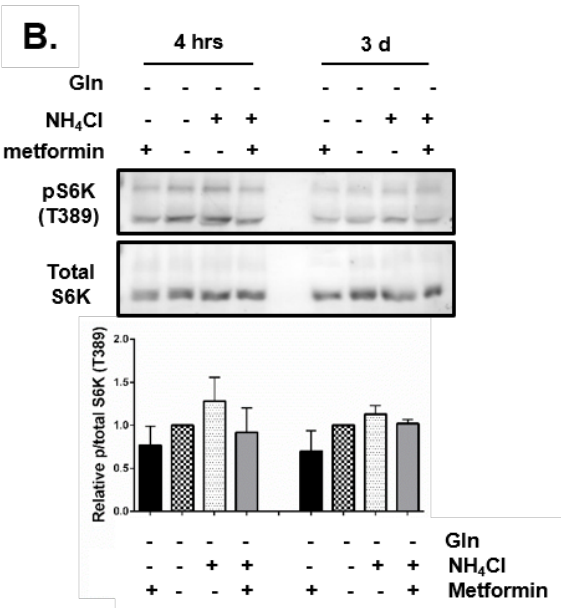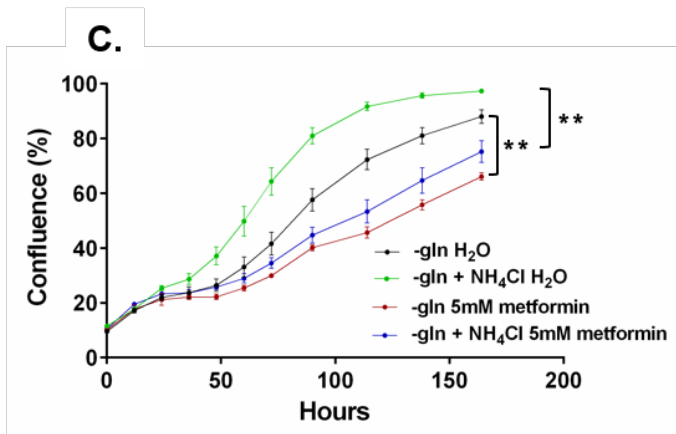

## Supplementary Figure 2.

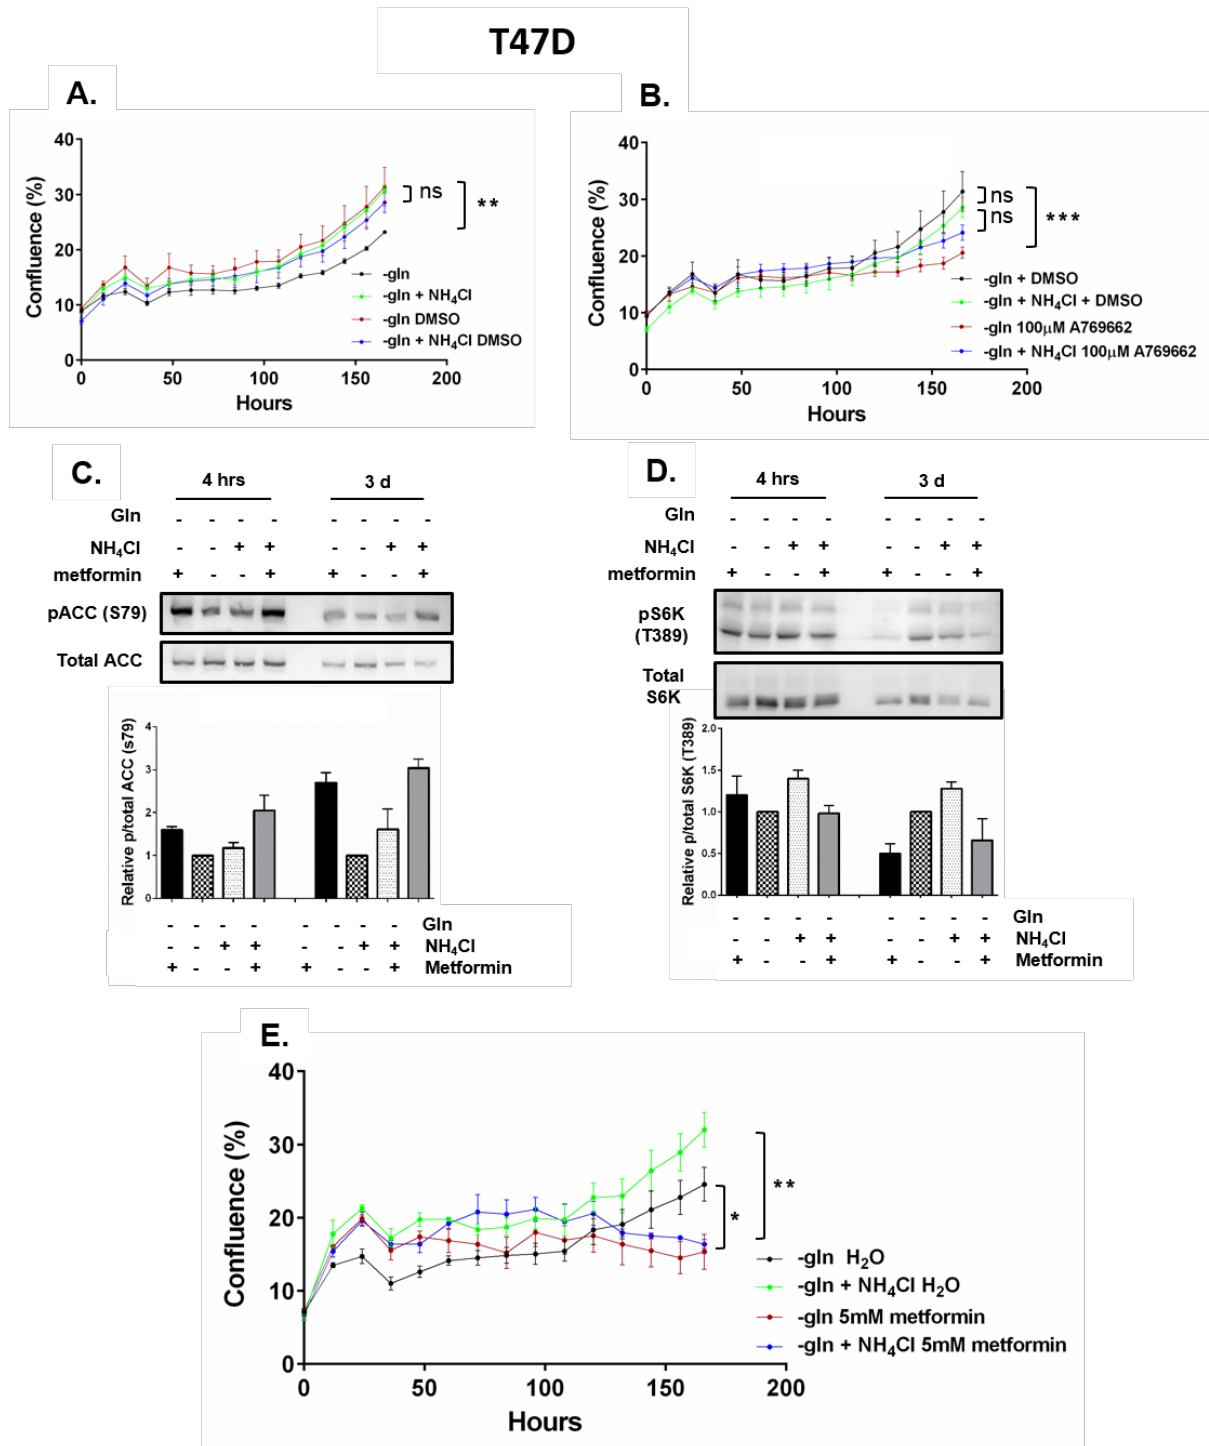

# Supplementary Figure 3.

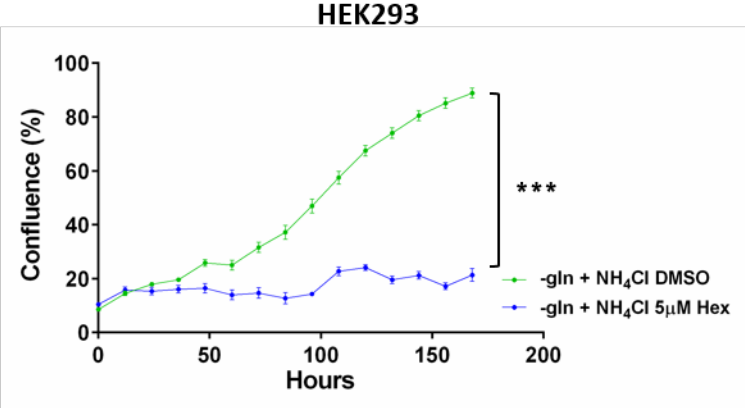

Supplementary Figure 4A

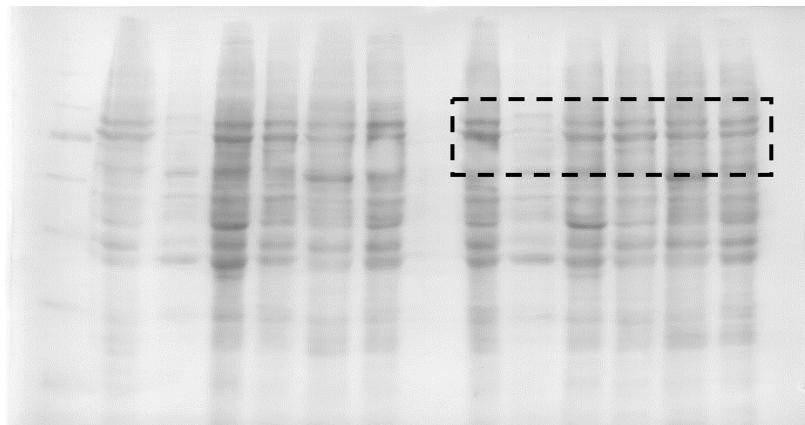

GS ponceau

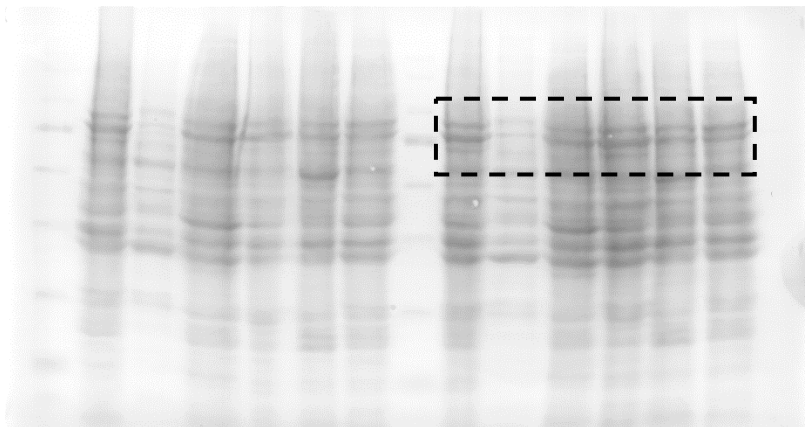

GDH ponceau

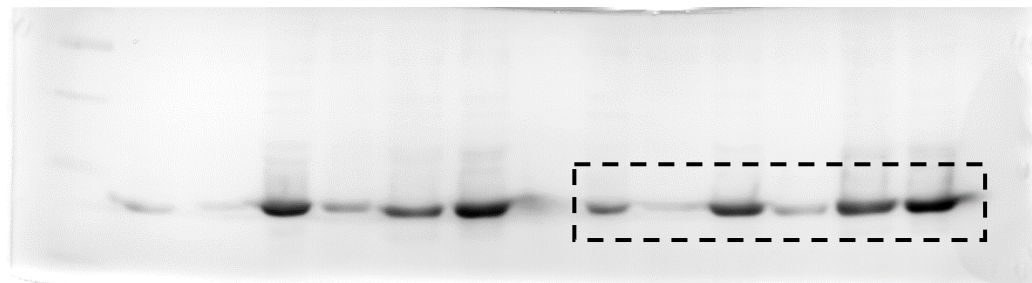

GS

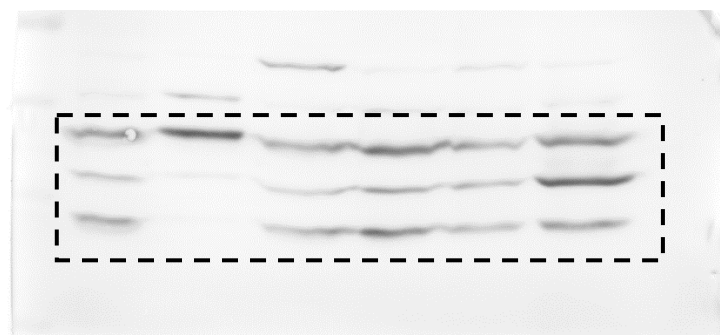

GDH

**Supplementary Figure 4B**

**HEK293**

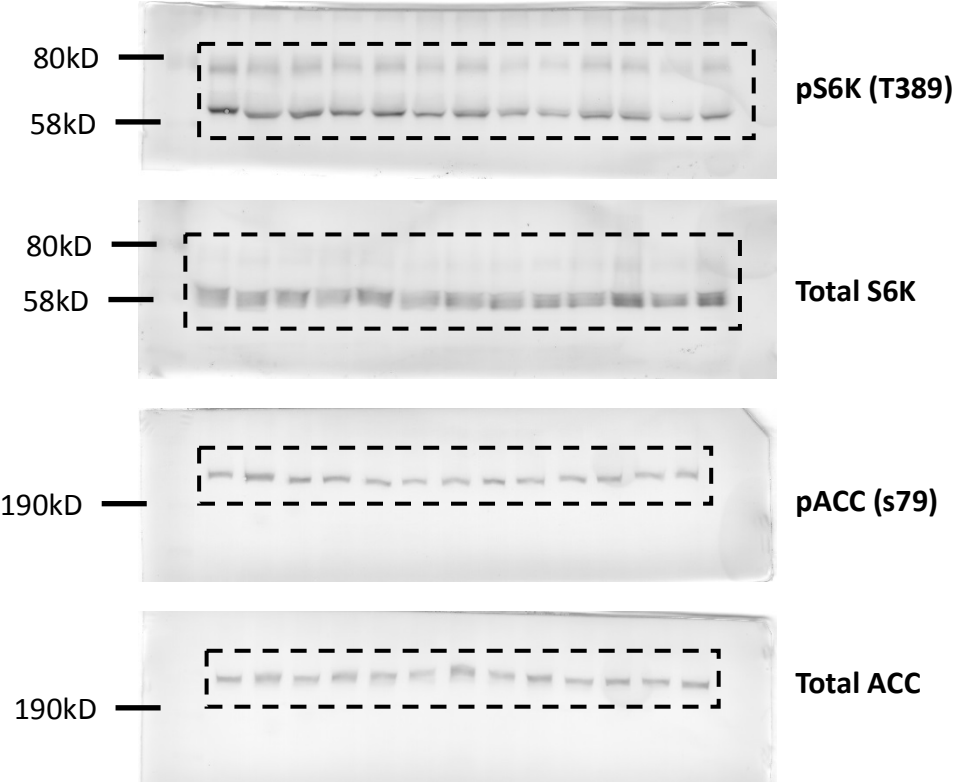

**Huh7**

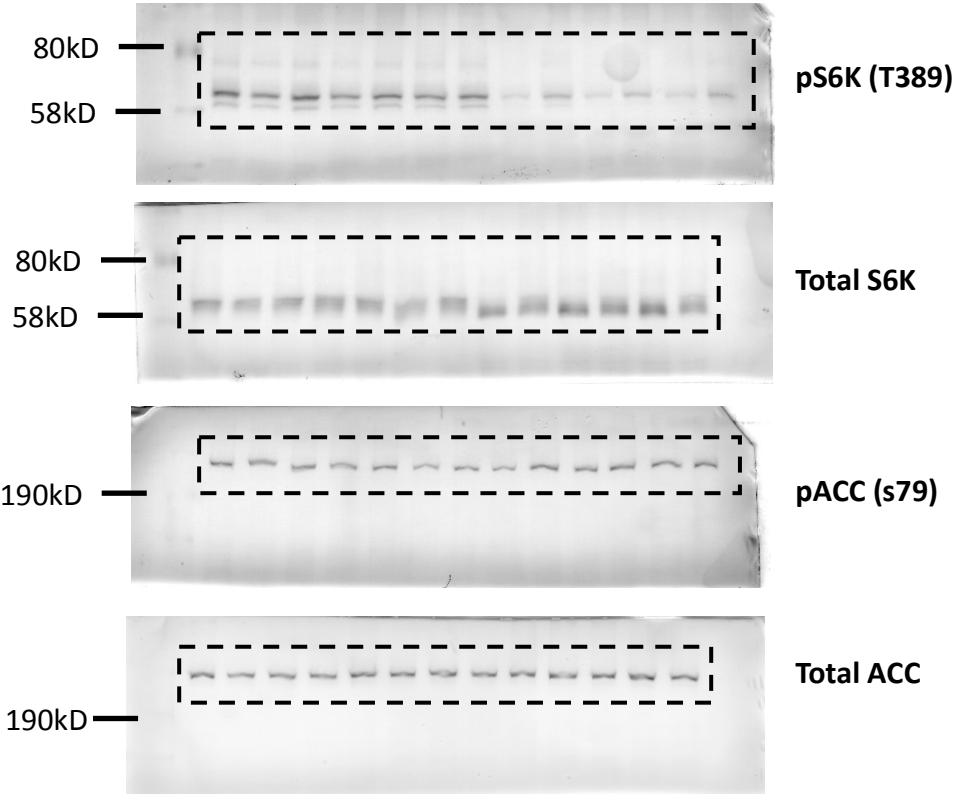



**Supplementary Figure 4C**

**T47D**

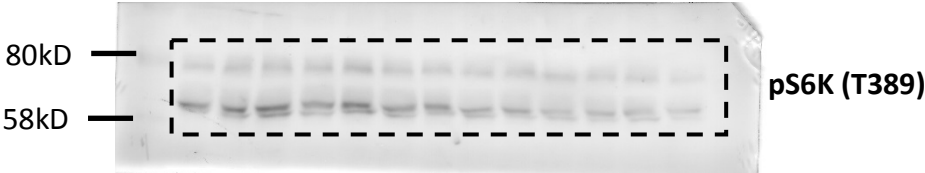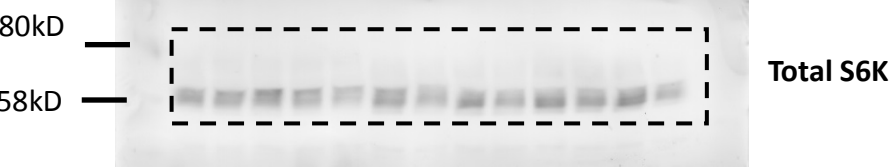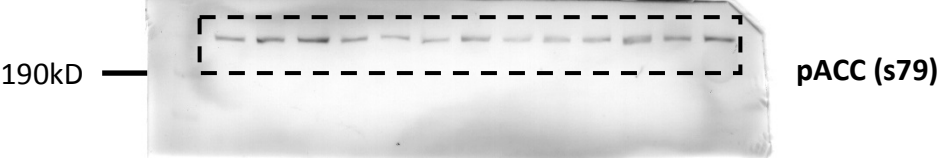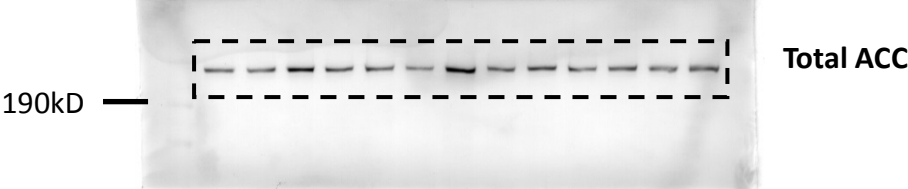

**MCF7**

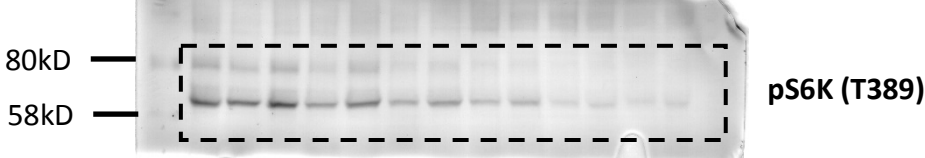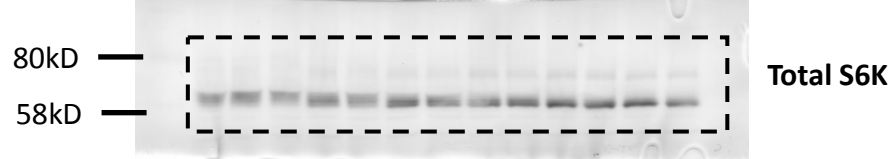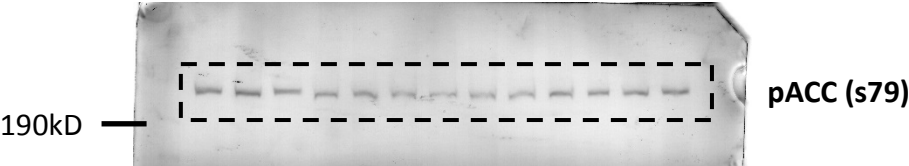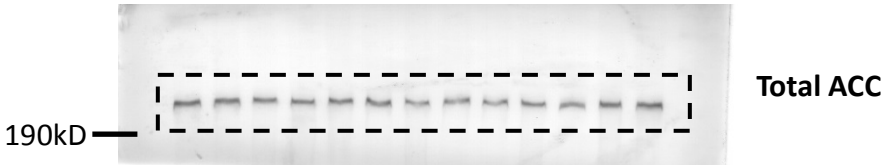

## Supplementary Figure 4D

### HEK293

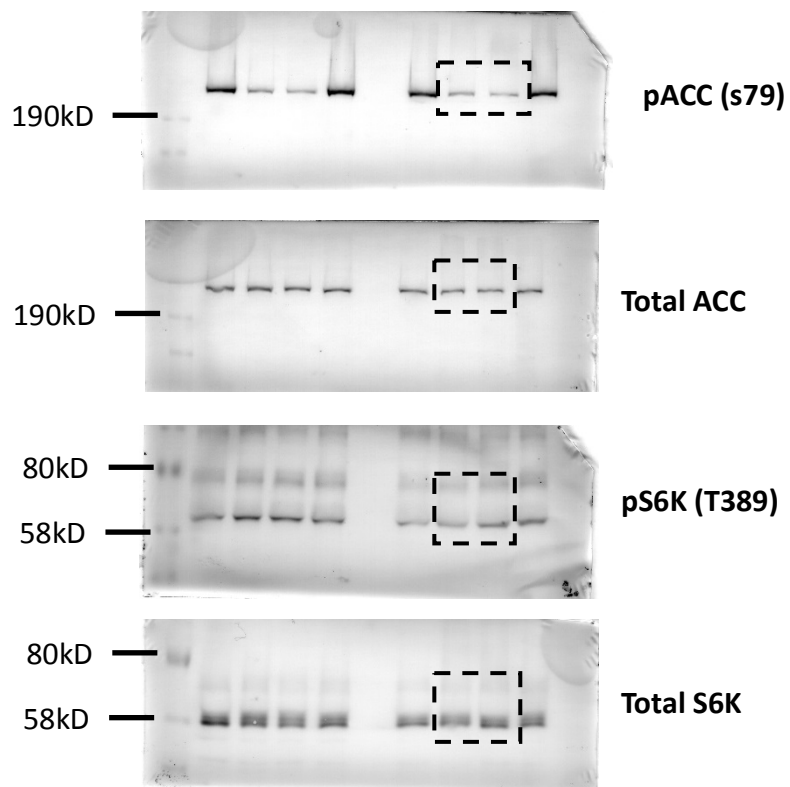

### T47D

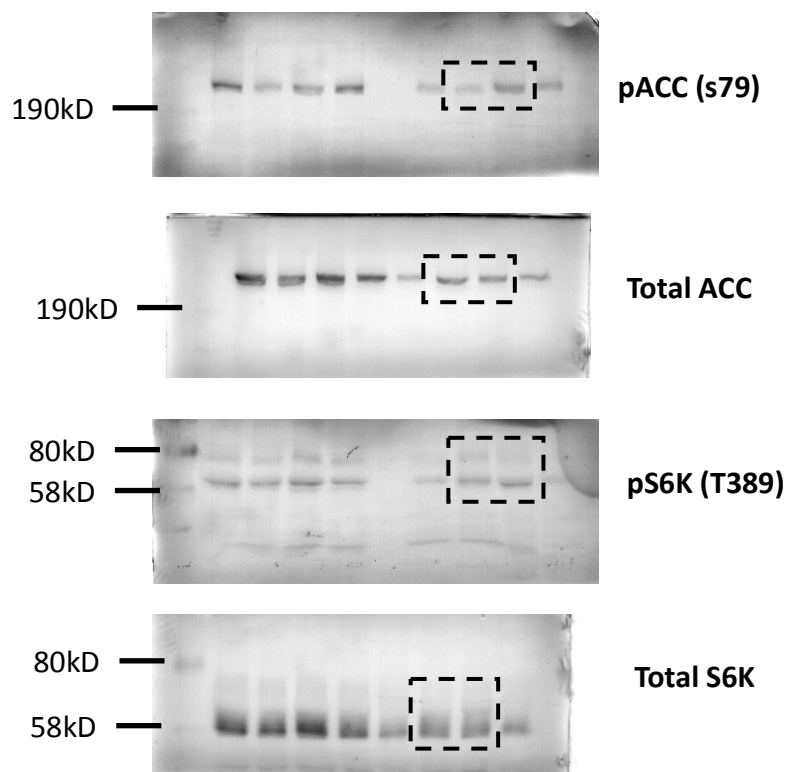

# Supplementary Figure 4E

HEK293

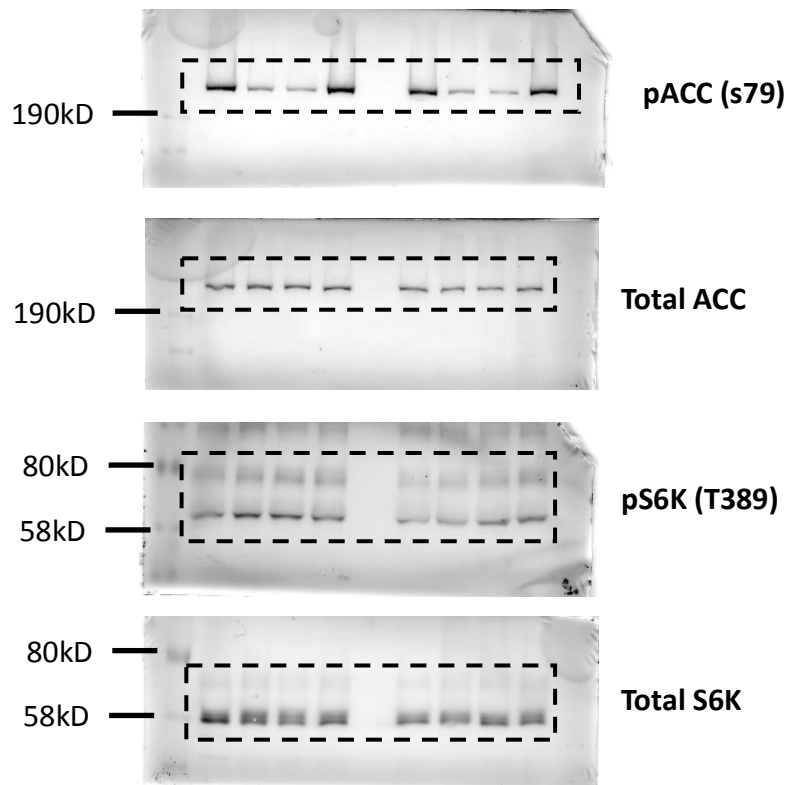

**Supplementary Figure 4F**

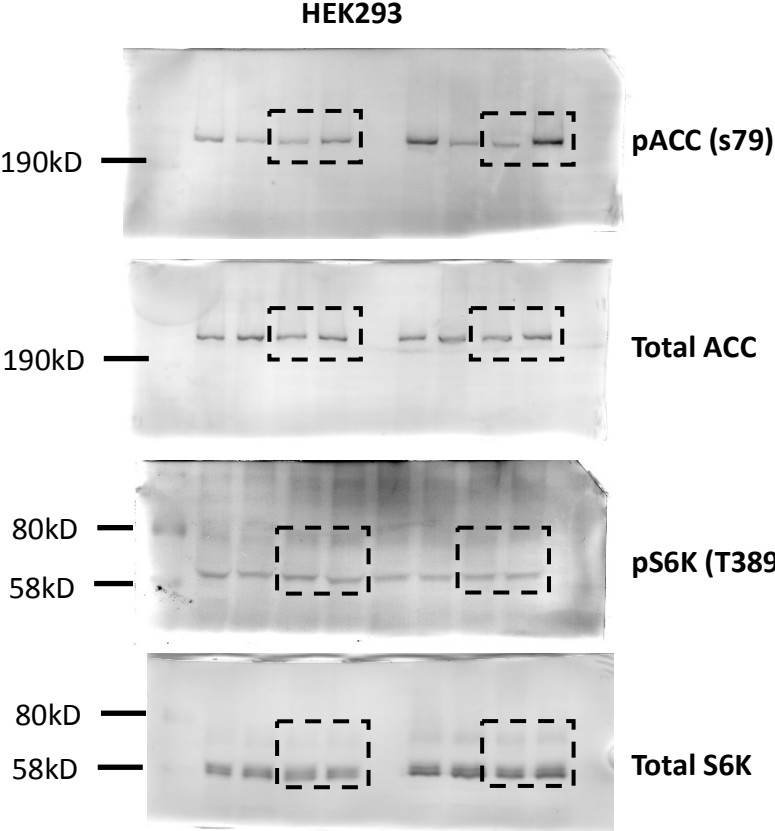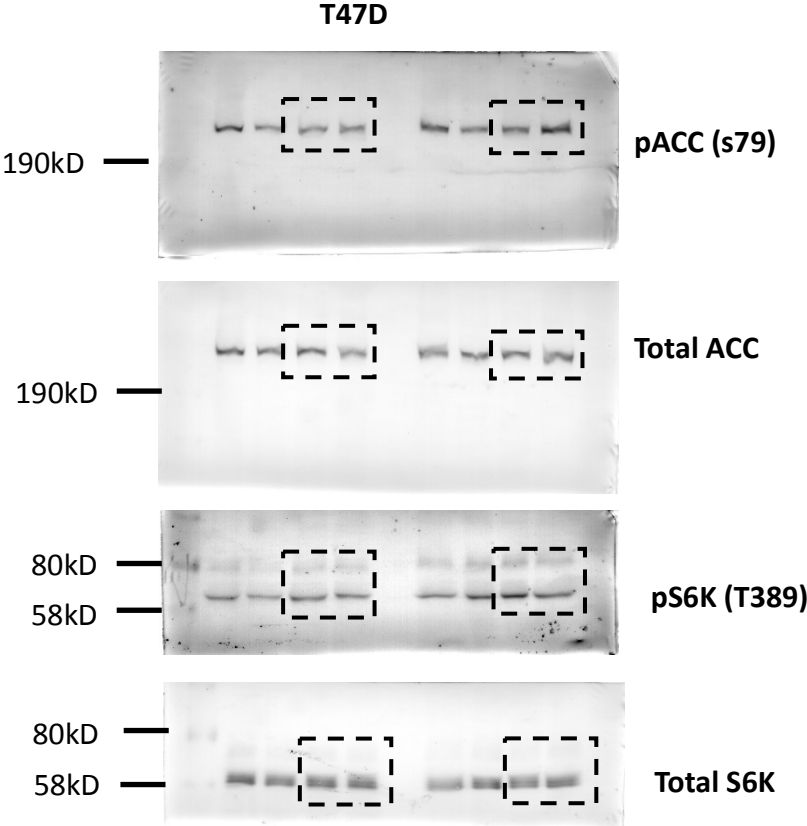

**Supplementary Figure 4G**

**HEK293**

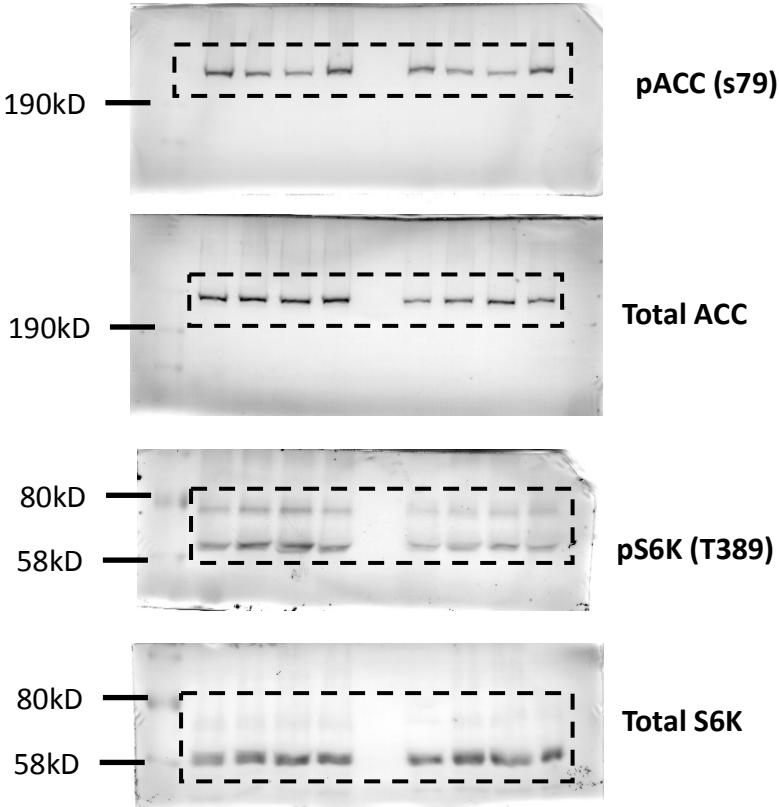

**Supplementary Figure 4H**

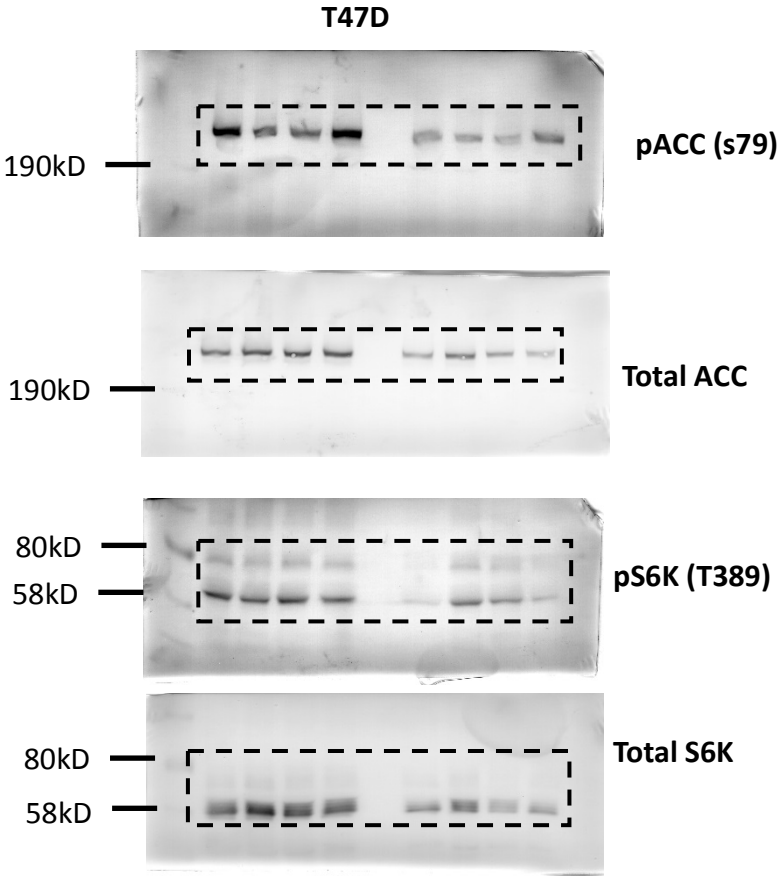

Supplement: 41598_2018_37509_MOESM1_ESM.pdf [file 41598_2018_37509_MOESM1_ESM.pdf]
